# Supplementary material for: IL-17A-driven psoriasis is critically dependent on IL-36 signaling
Source: PubMed Central journal article supplement (PMC10754973; doi:10.3389/fimmu.2023.1256133), 2023-12-11
Supplement: DataSheet_1.pdf [file DataSheet_1.pdf]

## Supplementary Figure 1

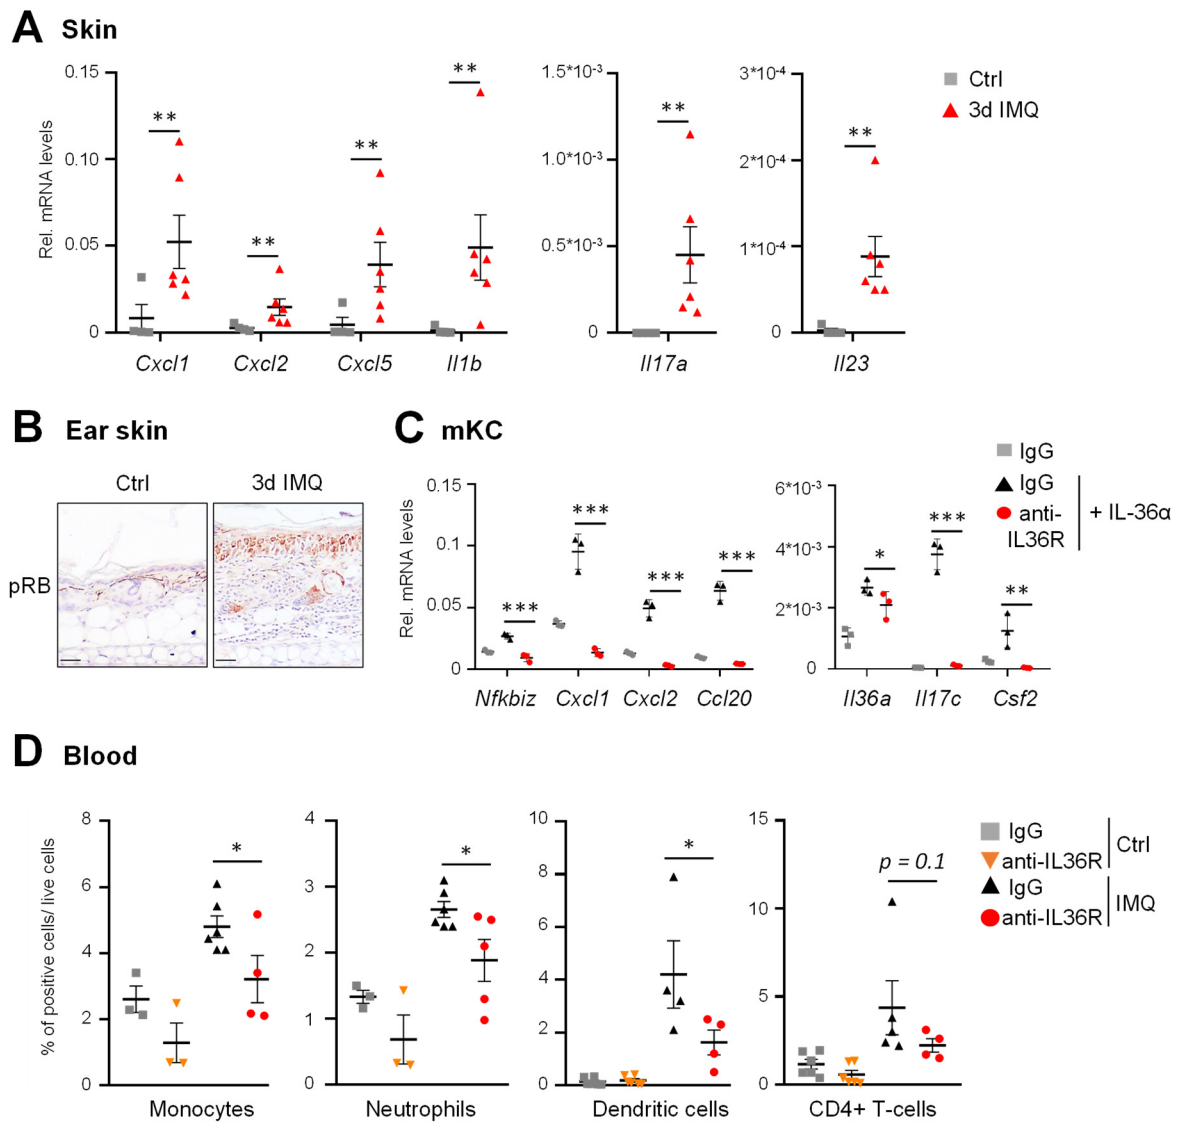

**Supplementary Figure 1. Additional data of IMQ- and IgG- or anti-IL36R-treated animals.** **A.** Relative mRNA expression levels of chemokines and cytokines in skin samples after 3 days of IMQ treatment, normalized to  $\beta$ -Actin  $\pm$  SEM. **B.** pRB staining of ear skin after 3 days of IMQ treatment. Scale: 30  $\mu$ m. **C.** Gene expression analysis of murine keratinocytes from Ctrl and IL-36 $\alpha$ -treated cells in the presence of IgG or anti-IL36R (50  $\mu$ g/mL), normalized to  $\beta$ -Actin  $\pm$  SD. **D.** Flow cytometry analysis of immune cell populations in the blood of control or IMQ-treated animals in the presence of IgG or anti-IL36R (n = 3 - 6 animals per group). Shown is the relative percentage of positive cells, after pre-gating on viable cells. P-values were calculated using a 2-tailed Student's t-test (\*P < 0.05, \*\*P < 0.01, and \*\*\*P < 0.001).

## Supplementary Figure 2

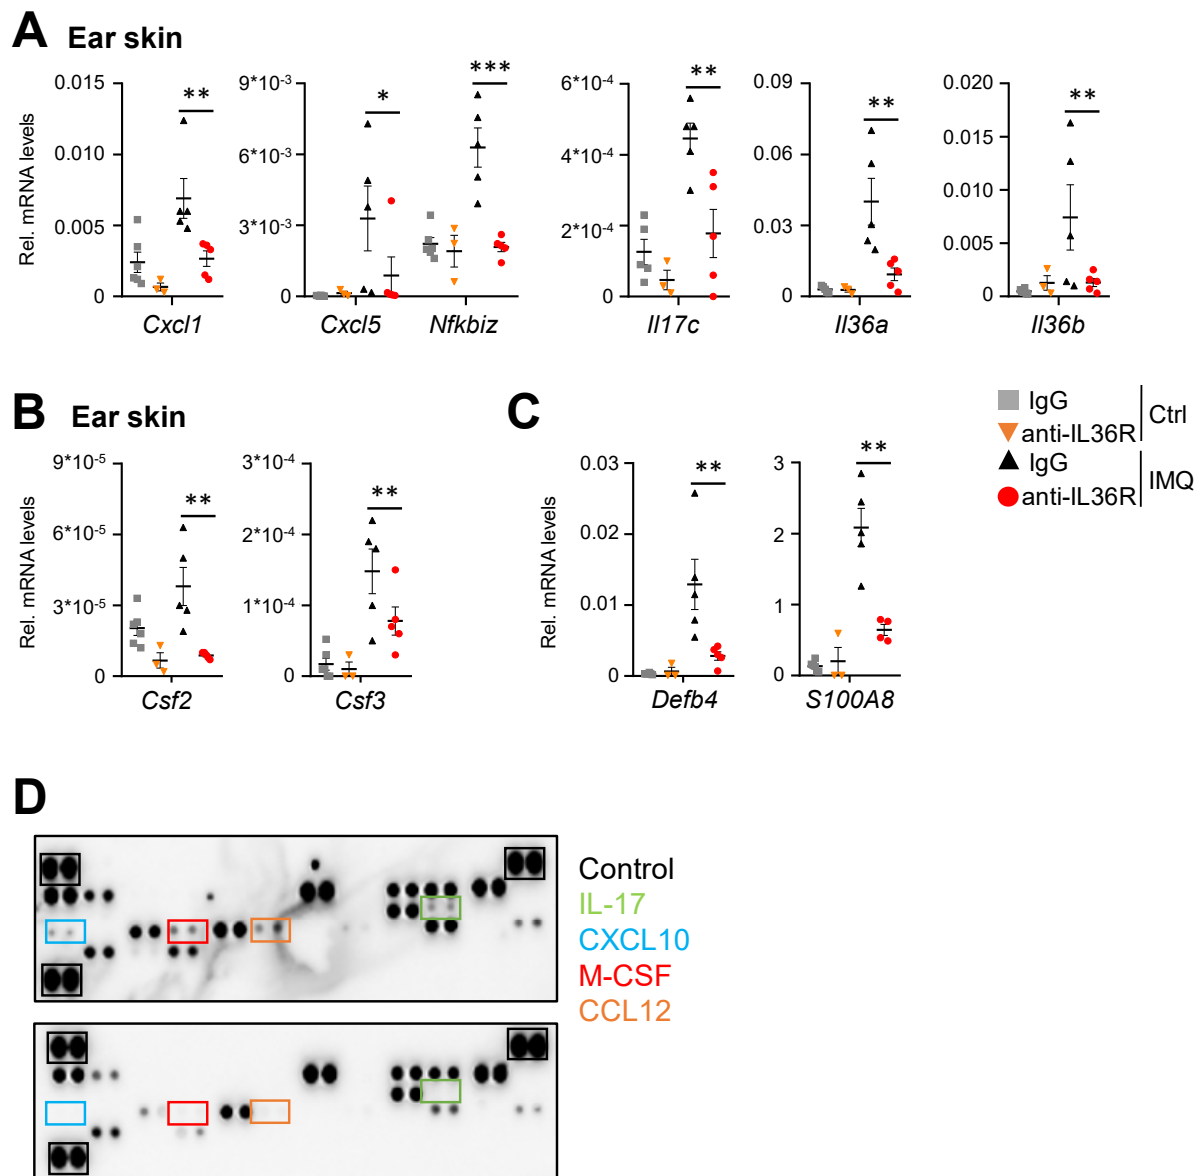

**Supplementary Figure 2. Extended analysis of pro-inflammatory gene expression in IMQ and anti-IL36R-treated mice.** **A – C.** Gene expression analysis of the skin from Ctrl or IMQ-treated animals, that received IgG or anti-IL36R treatment. Shown is the relative gene expression, normalized to  $\beta$ -Actin.  $n = 6$  for Ctrl + IgG,  $n = 3$  for Ctrl + anti-IL36R,  $n = 5$  for IMQ + IgG or IMQ + anti-IL36R. **A.** Cytokines and psoriasis-associated co-factors. **B.** Growth factors. **C.** Anti-microbial peptides. Significance was calculated using a 2-tailed Student's t-test ( $*P < 0.05$ ,  $**P < 0.01$ , and  $***P < 0.001$ ) showing the mean and standard error (SEM). **D.** Extended analysis of the cytokine array shown in Figure 3C. Shown is the same array with a longer exposition rate to visualize low-expressed proteins.

### Supplementary Figure 3

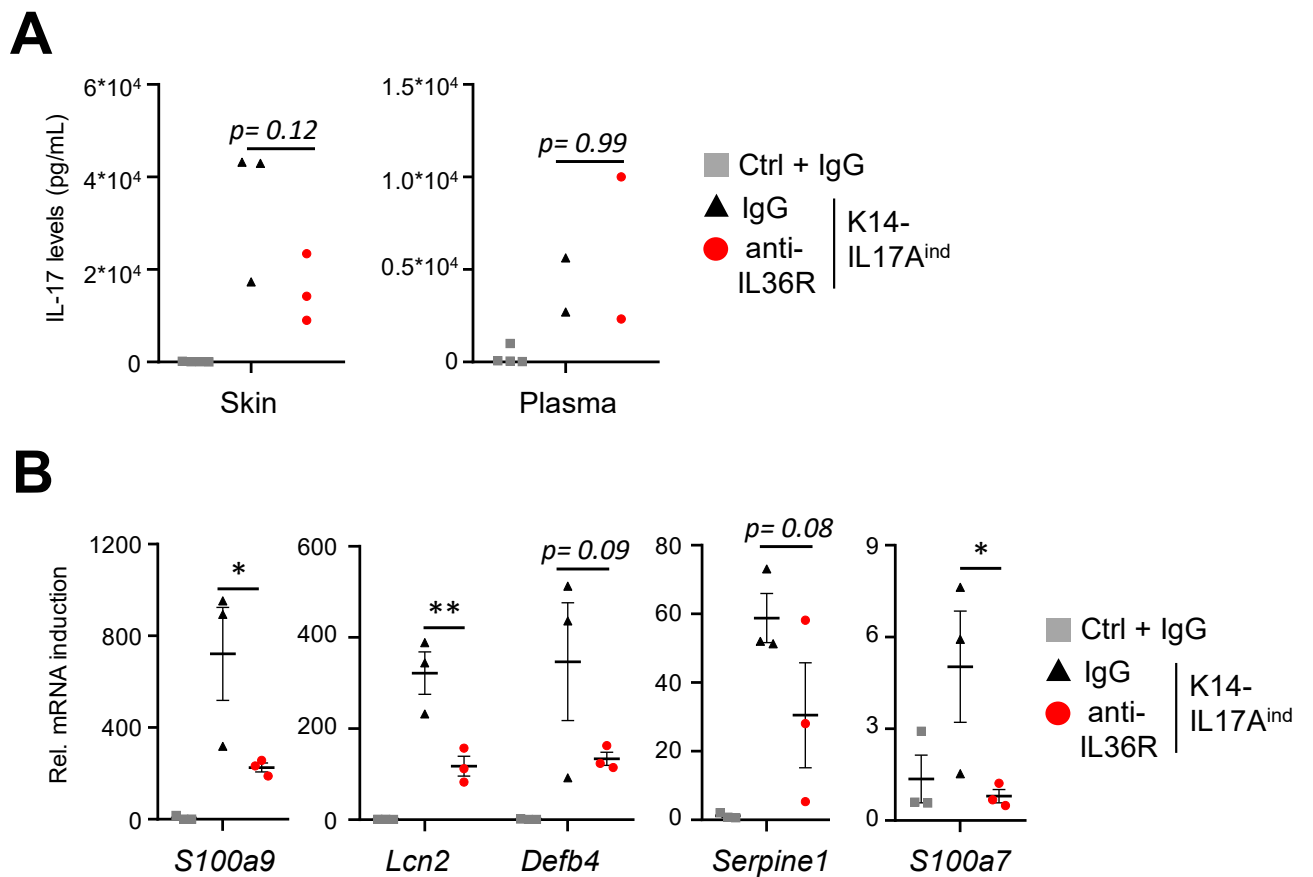

**Supplementary Figure 3. Additional data on the effects of anti-IL36R treatment in K14-IL17A<sup>ind</sup> mice.** **A.** Quantification of IL-17A levels in skin or plasma of control and K14-IL17A<sup>ind</sup> mice after receiving IgG or anti-IL36R treatment (n = 2-4 mice per group). **B.** Relative mRNA induction levels of antimicrobial peptides in skin lesions of IgG- and anti-IL36R-treated K14-IL17A<sup>ind</sup> mice, normalized to  $\beta$ -Actin  $\pm$  SD. P-values were calculated using a 2-tailed Student's t-test (\*P < 0.05, \*\*P < 0.01).

## Supplementary Figure 4

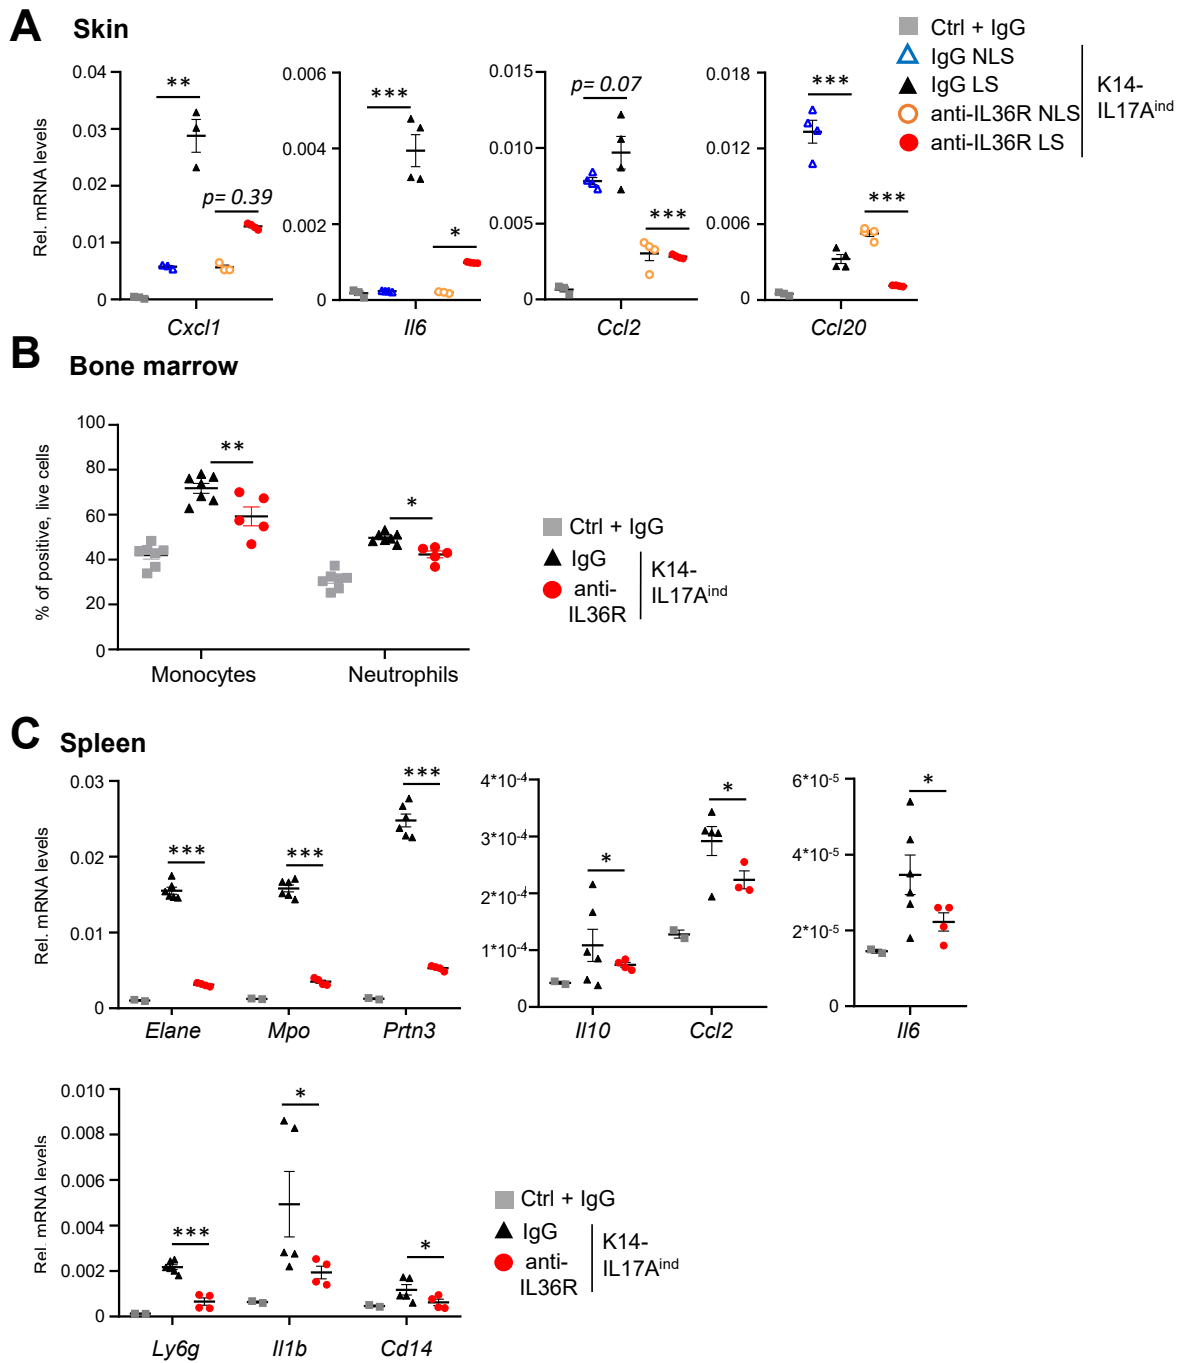

**Supplementary Figure 4. Systemic effects of an acute anti-IL36R treatment in psoriatic K14-IL17A<sup>ind</sup> mice.** **A.** Relative mRNA expression levels of chemokines and cytokines in samples of lesional (LS) and non-lesional (NLS) skin from IgG-treated control and IgG- or anti-IL36R treated K14-IL17A<sup>ind</sup> mice, normalized to  $\beta$ -Actin.  $n = 4 \pm$  SEM. **B.** Flow cytometry analysis of monocytes and neutrophils in the bone marrow of control or K14-IL17A<sup>ind</sup> mice, upon treatment with IgG or anti-IL36R antibodies ( $n = 5-7$  animals per group). Shown is the relative percentage of positive cells, after pre-gating on viable cells. **C.** Relative mRNA expression levels of cytokines and neutrophil-specific markers in spleen samples obtained from IgG-treated control and IgG- or anti-IL36R treated K14-IL17A<sup>ind</sup> mice, normalized to  $\beta$ -Actin.  $n = 3-5 \pm$  SEM. All P-values were calculated using a 2-tailed Student's t-test (\* $P < 0.05$ , \*\* $P < 0.01$ , and \*\*\* $P < 0.001$ ).



**Supplementary Table 1: Primer sequences for qPCR**

| <b>Primer</b> | <b>Sequence 5' – 3'</b>  | <b>Gene</b>        |
|---------------|--------------------------|--------------------|
| mgActin_F     | AGGAGTACGATGAGTCCGGC     | <i>Actin</i>       |
| mgActin_R     | GGTGTA AAAACGCAGCTCAGTA  |                    |
| mgCcl2_F      | CTGGAGCATCCACGTGTTGG     | <i>Ccl2</i>        |
| mgCcl2_R      | CCCATTCCCTTCTTGGGGTCAG   |                    |
| mgCcl20_F     | ACTACGACTGTTGCCTCTCG     | <i>Ccl20</i>       |
| mgCcl20_R     | CTTGACTCTTAGGCTGAGGAGG   |                    |
| mgCcl3_F      | TTCTGCTGACAAGCTCACCC     | <i>Ccl3</i>        |
| mgCcl3_R      | TCAACGATGAATTGGCGTGG     |                    |
| mgCd14_F      | ACTGAAGCCTTTCTCGGAGC     | <i>Cd14</i>        |
| mgCd14_R      | AGCAACAGCAACAAGCCAAG     |                    |
| mgCsf2_F      | TCACGTTGAATGAAGAGGTAGAAG | <i>Csf2</i>        |
| mgCsf2_R      | ACTTGTGTTTCACAGTCCGTTTC  |                    |
| mgCsf3_F      | ATCCATGGCTCAACTTTCTGC    | <i>Csf3</i>        |
| mgCsf3_R      | GCTGCAGGGCCATTAGCTTC     |                    |
| mgCxcl1_F     | ACGTGTTGACGCTTCCCTTG     | <i>Cxcl1</i>       |
| mgCxcl1_R     | TCCTTTGAACGTCTCTGTCCC    |                    |
| mgCxcl2_F     | CGCCCAGACAGAAGTCATAGC    | <i>Cxcl2</i>       |
| mgCxcl2_R     | CTTTGGTTCTTCCGTTGAGGG    |                    |
| mgCxcl5_F     | CCCTACGGTGG AAGTCATAGC   | <i>Cxcl5</i>       |
| mgCxcl5_R     | GAACACTGGCCGTTCTTTCC     |                    |
| mgDefb4_F     | GGTGCTGCTGTCTCCACTTG     | <i>Defb4</i>       |
| mgDefb4_R     | TATTCATCTTGCTGGTTCTTCGTC |                    |
| mgElane_F     | ACCCAGTGTGCTACAAGAGC     | <i>Elane</i>       |
| mgElane_R     | GTGCATACGTTACACGACG      |                    |
| mgIfng_F      | GACAATCAGGCCATCAGCAAC    | <i>Ifng</i>        |
| mgIfng_R      | CATTGAATGCTTGGCGCTGG     |                    |
| mgIl17a_F     | GCCCTCAGACTACCTCAACC     | <i>Il17a</i>       |
| mgIl17a_R     | TTCCCTCCGCATTGACACAG     |                    |
| mgIl17c_F     | GGAGACAGCATGAAGGACCTC    | <i>Il17c</i>       |
| mgIl17c_R     | GCTTCTGTGGGTAGCGGTTC     |                    |
| mgIl17f_F     | TGCTACTGTTGATGTTGGGAC    | <i>Il17f</i>       |
| mgIl17f_R     | AATGCCCTGGTTTTGGTTGAA    |                    |
| mgIl1b_F      | AGCTGAAAGCTCTCCACCTC     | <i>Il1b</i>        |
| mgIl1b_R      | GCTTGGGATCCACACTCTCC     |                    |
| mgIl22_F      | CCTACATGCAGGAGGTGGTG     | <i>Il22</i>        |
| mgIl22_R      | CCCAATCGCCTTGATCTCTCC    |                    |
| mgIl23a_F     | CAGCTCTCTCGGAATCTCTGC    | <i>Il23a</i>       |
| mgIl23a_R     | TGTCCTTGAGTCCTTGTGGG     |                    |
| mgIl33_F      | CTCACTGCAGGAAAGTACAGC    | <i>Il33</i>        |
| mgIl33_R      | TGGTCTTCTGTTGGGATCTTC    |                    |
| mgIl36a_F     | GCCTGTTCTGCACAAAGGATG    | <i>Il36a/Il1f6</i> |
| mgIl36a_R     | ACAGCGATGAACCAACCAGG     |                    |
| mgIl36b_F     | AGGGCAAACCAACTTTGCAG     | <i>Il36b</i>       |

|              |                         |                     |
|--------------|-------------------------|---------------------|
| mgIl36b_R    | GAAGTGGAGCCCTCTATGCC    |                     |
| mgIl36g_F    | GTCAGCGTGACTIONATCCTCCC | <i>Il36g/Il1f8</i>  |
| mgIl36g_R    | TGGCTTCATTGGCTCAGGG     |                     |
| mgIl1rl2_F   | TTACGCGACACAGCTTGTTTG   | <i>Il1rl2/IL36R</i> |
| mgIl1rl2_R   | TCACACGTATCTGCTGCCAC    |                     |
| mgIl6_F      | GTCCGGAGAGGAGACTTCAC    | <i>Il6</i>          |
| mgIl6_R      | GCAAGTCGATCATCGTTGTTC   |                     |
| mgLcn2_F     | AATGTCACCTCCATCCTGGTC   | <i>Lcn2</i>         |
| mgLcn2_R     | ACTGGTTGTAGTCCGTGGTG    |                     |
| mgLy6g_F     | ACCTGAGACTTCCTGCAACAC   | <i>Ly6g</i>         |
| mgLy6g_R     | CACGTTGACAGCATTACCAGTG  |                     |
| mgMpo_F      | GGAGGCCCGGAAGATTGTAG    | <i>Mpo</i>          |
| mgMpo_R      | CGTTGGTGAAGACATTGGCG    |                     |
| mgNfkbiz_F   | AACTCGCCAAGAGACCAGTG    | <i>Nfkbiz</i>       |
| mgNfkbiz_R   | AGAGCCACTGACTTGGAACG    |                     |
| mgNos2_F     | ACAGGGCTACAACATCCTGG    | <i>Nos2</i>         |
| mgNos2_R     | GACTCTGAGGCTGTGTGGTG    |                     |
| mgPrtn3_F    | CAGCTAAACCGGACAGCCTC    | <i>Prtn3</i>        |
| mgPrtn3_R    | GTTCCCGGCATAGGAAGGTG    |                     |
| mgRpl37a_F   | CCAAGGCCTACCACCTTCAG    | <i>Rpl37a</i>       |
| mgRpl37a_R   | CTTGGGTTTCGGCGTTGTTC    |                     |
| mgS100A7_F   | TCTGCTCTTGGATAGTGTGCC   | <i>S100a7</i>       |
| mgS100A7_R   | TGATGTAGTATGGCTGCCTGC   |                     |
| mgS100A9_F   | AATGGTGAAGCACAGTTGG     | <i>S100a9</i>       |
| mgS100A9_R   | CTGGTTTGTGTCCAGGTCCTC   |                     |
| mgSerpine1_F | CAAATGGTGGCCCAATAGCG    | <i>Serpine1</i>     |
| mgSerpine1_R | AGCAAGCTGTGTCAAGGGAG    |                     |
| mgTnfa_F     | AAGTTCCCAAATGGCCTCCC    | <i>Tnfa</i>         |
| mgTnfa_R     | TTGCTACGACGTGGGCTAC     |                     |
